# Supplementary material for: Bone evaluation study-2: update on the epidemiology of osteoporosis in Germany
Source: Springer Nature journal article supplement (doi:10.1007/s11657-024-01380-9), 2024-04-09
Supplement: MOESM1 [file 26959624]

Table S1: Diagnosis codes used for identification from the International Classification of Diseases, 10<sup>th</sup> Edition, German Modification (ICD-10-GM)

| Number | Description                                        | ICD-10-GM Code                                                                                                                                                                                                                                                                                                          |
|--------|----------------------------------------------------|-------------------------------------------------------------------------------------------------------------------------------------------------------------------------------------------------------------------------------------------------------------------------------------------------------------------------|
|        | <b>Osteoporosis</b>                                |                                                                                                                                                                                                                                                                                                                         |
| 1      | Osteoporosis with current pathological fracture    | M80.x, M48.5*                                                                                                                                                                                                                                                                                                           |
| 2      | Osteoporosis without current pathological fracture | M81.x                                                                                                                                                                                                                                                                                                                   |
|        | <b>Fractures</b>                                   |                                                                                                                                                                                                                                                                                                                         |
| 3      | Vertebral fracture                                 | S22.0x, S22.1<br>S32.0x<br>M80.x8*, M48.5*                                                                                                                                                                                                                                                                              |
| 4      | Hip fracture                                       | S72.0x except S72.08<br>S72.1, S72.2<br>M 80.x5*                                                                                                                                                                                                                                                                        |
| 5      | Non-hip fracture, non-vertebral fractures          | (S.22.3 (ribs))<br>S32.1, S32.4, S32.5 (pelvis)<br>S42.2 (proximal humerus)<br>S52.5 (distal radius)<br>M80.x0,1,2,3,4,6,7,9*) or (M 80.x*<br>(including, among others,<br>M80.99*, M80.08*))<br>AND NOT (Number 1 or<br>Number 2 or S22.3 or S32.1 or<br>S32.4 or S32.5 or S42.2 or S52.5 or<br>M80.x0,1,2,3,4,6,7,9)) |
| 6      | Forearm fracture                                   | S52.5, S52.6. 52.8, 52.9, M80.x3*                                                                                                                                                                                                                                                                                       |
| 7      | Fracture of humerus                                | S42.2x, M80.x2*                                                                                                                                                                                                                                                                                                         |
| 8      | Fracture of pelvis                                 | S32.1, S32.4, S32.5                                                                                                                                                                                                                                                                                                     |
| 9      | Fracture of neck of the femur                      | S72.0x except S72.08                                                                                                                                                                                                                                                                                                    |
| 10     | Pertrochanteric fracture                           | S72.1                                                                                                                                                                                                                                                                                                                   |
| 11     | Large osteoporotic fracture                        | S22.01-06<br>S32.00<br>S32.01-05S 52.4<br>S72.0<br>S72.00                                                                                                                                                                                                                                                               |

|    |                                 |                                                                                                                       |
|----|---------------------------------|-----------------------------------------------------------------------------------------------------------------------|
|    |                                 | S72.01-05<br>S72.1<br>S72.2<br>S52.4, S42.2<br>S42.2, S42.20, S42.21<br>S42.22 S42.23 S42.24<br>S42.29, M80.x2,3,5,8* |
| 12 | Osteoporotic fracture, any form | Number 1 or<br>Number 2 or<br>Number 3 or<br>M80.x* (including, among others,<br>M80.99*, M80.08*)                    |

An asterisk (\*) indicates that at this position a modifier for any feature is allowed.

Table S2: Codes used from the Anatomical Therapeutic Chemical (ATC) Classification System

| <b>Class</b>       | <b>ATC code</b> |
|--------------------|-----------------|
| Calcium            | A12A            |
| Hormone therapy    | G03             |
| Vitamin D          | A11C2 or A11C3  |
| Bisphosphonates    | M05BA           |
| Denosumab          | M05BX04         |
| Tibolone           | G03CX01         |
| Raloxifene         | G03XC01         |
| Strontium ranelate | M05BX03         |
| Parathormone       | H05AA03         |
